1 **SARS-CoV-2 and SARS-CoV differ in their cell tropism and drug**  
2 **sensitivity profiles**

3 Denisa Bojkova<sup>1#</sup>, Jake E. McGreig<sup>2#</sup>, Katie-May McLaughlin<sup>2#</sup>, Stuart G. Masterson<sup>2</sup>,  
4 Marek Widera<sup>1</sup>, Verena Krähling<sup>3</sup>, Sandra Ciesek<sup>1,4</sup>, Mark N. Wass<sup>2\*</sup>, Martin  
5 Michaelis<sup>2\*</sup>, Jindrich Cinatl jr.<sup>1\*</sup>

6  
7 <sup>1</sup> Institute for Medical Virology, University Hospital, Goethe University Frankfurt am  
8 Main, Germany

9 <sup>2</sup> School of Biosciences, University of Kent, Canterbury, UK

10 <sup>3</sup> Institute of Virology, Biomedical Research Center (BMFZ), Philipps University  
11 Marburg, Germany

12 <sup>4</sup> German Center for Infection Research, DZIF, Braunschweig, Germany

13  
14 # equal contribution

15 \* Corresponding authors: Jindrich Cinatl jr. (Cinatl@em.uni-frankfurt.de), Martin  
16 Michaelis (M.Michaelis@kent.ac.uk), Mark N. Wass (M.N.Wass@kent.ac.uk)

17

18 **Abstract**

19 SARS-CoV-2 is a novel coronavirus currently causing a pandemic. We show  
20 that the majority of amino acid positions, which differ between SARS-CoV-2 and the  
21 closely related SARS-CoV, are differentially conserved suggesting differences in  
22 biological behaviour. In agreement, novel cell culture models revealed differences  
23 between the tropism of SARS-CoV-2 and SARS-CoV. Moreover, cellular ACE2  
24 (SARS-CoV-2 receptor) and TMPRSS2 (enables virus entry via S protein cleavage)  
25 levels did not reliably indicate cell susceptibility to SARS-CoV-2. SARS-CoV-2 and  
26 SARS-CoV further differed in their drug sensitivity profiles. Thus, only drug testing  
27 using SARS-CoV-2 reliably identifies therapy candidates. Therapeutic concentrations  
28 of the approved protease inhibitor aprotinin displayed anti-SARS-CoV-2 activity. The  
29 efficacy of aprotinin and of remdesivir (currently under clinical investigation against  
30 SARS-CoV-2) were further enhanced by therapeutic concentrations of the proton  
31 pump inhibitor omeprazole (aprotinin 2.7-fold, remdesivir 10-fold). Hence, our study  
32 has also identified anti-SARS-CoV-2 therapy candidates that can be readily tested in  
33 patients.

34  
35 **Key words:** severe acute respiratory syndrome coronavirus, severe acute respiratory  
36 syndrome coronavirus 2, ACE2, 2019-nCoV, COVID-19, antiviral, drug discovery, cell  
37 tropism, TMPRSS2, aprotinin, remdesivir, omeprazole

38

## 39 Introduction

40 In December 2019, SARS-CoV-2, a novel betacoronavirus, was identified that  
41 causes a respiratory disease and pneumonia called coronavirus disease 19 (COVID-  
42 19) [Chen et al., 2020; Coronaviridae Study Group of the International Committee on  
43 Taxonomy of Viruses, 2020; Lu et al., 2020; Wu et al., 2020; Zhou et al., 2020; Zhu et  
44 al., 2020]. The first cases seemed to have originated from a wholesale fish market in  
45 Wuhan, China [Zhu et al., 2020]. As of 3<sup>rd</sup> April 2020, this novel virus has resulted in  
46 1,041,126 confirmed infections and 55,132 deaths in 181 countries and regions  
47 ([www.who.int](http://www.who.int)) [Dong et al., 2020].

48 SARS-CoV-2 is the seventh coronavirus known to infect and cause disease in  
49 humans alongside the alphacoronaviruses human coronavirus 229E (HCoV-229E)  
50 and human coronavirus NL63 (HCoV-NL63, New Haven coronavirus) and the  
51 betacoronaviruses human coronavirus OC43 (HCoV-OC43), human coronavirus  
52 HKU1 (HCoV-HKU1), severe acute respiratory syndrome coronavirus (SARS-CoV),  
53 and Middle East respiratory syndrome coronavirus (MERS-CoV) [Corman et al., 2018;  
54 Yin and Wunderink, 2018; Cui et al., 2019; Wu et al., 2020b]. HCoV-229E, HCoV-  
55 OC43, HCoV-NL63, and HCoV-HKU1 are endemic in humans and typically cause mild  
56 to moderate common cold-like respiratory disease [Channappanavar & Perlman,  
57 2017; Corman et al., 2018].

58 Since 2002, SARS-CoV-2 is the third coronavirus, after SARS-CoV and MERS-  
59 CoV, that has caused a substantial outbreak associated with significant mortality [Wu  
60 et al., 2020b]. According to WHO, the SARS-CoV outbreak resulted in 8,098 confirmed  
61 and suspected cases and 774 deaths, equalling a mortality rate of 9.6%  
62 ([www.who.int](http://www.who.int)). For MERS-CoV, the WHO currently (2nd April 2020) reports 2,494  
63 laboratory-confirmed cases and 858 deaths (mortality rate: 34.4%) ([www.who.int](http://www.who.int)).  
64 However, human-to-human spread of MERS-CoV remains very limited. SARS-CoV-2  
65 disease is associated with a lower mortality. Currently, about 5.3% of individuals with  
66 confirmed SARS-CoV-2 infection have died, and the risk of severe disease increases  
67 with age [Dong et al., 2020; CDC COVID-19 Response Team, 2020]. This mortality  
68 level is likely to be an overestimation. A mortality rate of 1% or less may be more  
69 realistic, because patients with severe symptoms are more likely to be tested, while  
70 mild and asymptomatic cases are likely to go unreported [Borges do Nascimento,  
71 2020; Nishiura et al., 2020; Pan et al., 2020; Rothe et al., 2020]. In contrast to SARS-  
72 CoV-infected patients, SARS-CoV-2 has been reported to be spread by individuals  
73 who are asymptomatic during the incubation period or who do not develop symptoms  
74 at all [Li et al., 2020; Nishiura et al., 2020; Nishiura et al., 2020a; Pan et al., 2020;  
75 Rothe et al., 2020; Yu et al., 2020]

76 We have developed an approach to identify sequence-associated phenotypic  
77 differences between related viruses based on the identification of differentially  
78 conserved amino acid sequence positions (DCPs) and in silico modelling of protein  
79 structures [Pappalardo et al., 2016; Martell et al., 2019]. Here, we used this method to  
80 identify differentially conserved positions that may explain phenotypic differences  
81 between SARS-CoV-2 and SARS-CoV [Coronaviridae Study Group of the  
82 International Committee on Taxonomy of Viruses, 2020; Lu et al., 2020; Zhou et al.,  
83 2020]. These findings were analysed in combination with data from cells infected with  
84 a recently derived SARS-CoV-2 isolate [Hoehl et al., 2020]. Our results reveal  
85 characteristic differences between SARS-CoV-2 and SARS-CoV. Most importantly,  
86 we found that therapeutic concentrations of the protease inhibitor aprotinin interfere  
87 with SARS-CoV-2 infection. The efficacy of aprotinin can be further increased by  
88 therapeutic concentrations of the proton pump inhibitor omeprazole.

## 89 Results

90

### 91 Determination of differentially conserved positions (DCPs)

92 Coronavirus genomes harbour single-stranded positive sense RNA (+ssRNA)  
93 of about 30 kilobases in length, which contain six or more open reading frames (ORFs)  
94 [Cui et al., 2019; Song et al., 2019; Chen et al., 2020b; Wu et al., 2020b]. The SARS-  
95 CoV-2 genome has a size of approximately 29.8 kilobases and was annotated to  
96 encode 14 ORFs and 27 proteins [Wu et al., 2020b]. Two ORFs at the 5'-terminus  
97 (ORF1a, ORF1ab) encode the polyproteins pp1a and pp1b, which comprise 15 non-  
98 structural proteins (nsps), the nsps 1 to 10 and 12-16 [Wu et al., 2020b]. Additionally,  
99 SARS-CoV-2 encodes four structural proteins (S, E, M, N) and eight accessory  
100 proteins (3a, 3b, p6, 7a, 7b, 8b, 9b, orf14) [Wu et al., 2020b]. This set-up resembles  
101 that of SARS-CoV. Notable differences include that there is an 8a protein in SARS-  
102 CoV, which is absent in SARS-CoV-2, that 8b is longer in SARS-CoV-2 (121 amino  
103 acids) than in SARS-CoV (84 amino acids), and that 3b is shorter in SARS-CoV-2 (22  
104 amino acids) than in SARS-CoV (154 amino acids) [Wu et al., 2020b].

105 To identify genomic differences between SARS-CoV-2 and SARS-CoV that  
106 may affect the structure and function of the encoded virus proteins, we applied an  
107 approach that we have previously used to compare the human pathogenic  
108 Ebolaviruses species with Reston virus, an Ebolavirus that does not cause disease in  
109 humans [Pappalardo et al., 2016; Martell et al., 2019]. This methodology is based on  
110 the determination of differentially conserved positions (DCPs) [Rausell et al., 2010],  
111 i.e. amino acid positions that are differently conserved between phenotypically  
112 different groups, in our case related viruses. The potential impact of the DCPs on  
113 protein structure and function is then determined by in silico modelling [Pappalardo et  
114 al., 2016; Martell et al., 2019].

115 For the 22 SARS-CoV-2 virus proteins that could be compared with SARS-CoV,  
116 comparison of the two reference sequences identified 1393 positions that encode  
117 different amino acids. 1243 (89%) of these positions were DCPs (Table 1), which  
118 represents 13% of all residues encoded by the SARS-CoV-2 genome. Most of the  
119 amino acid substitutions at DCPs appear to be fairly conservative as demonstrated by  
120 the average BLOSUM substitution score of 0.49 (median 0; Supplementary Figure 1)  
121 and with 73% of them having a score of 0 or greater (the higher the score the more  
122 frequently such amino acid substitutions are observed naturally in evolution). It  
123 followed that 45% of DCPs represent conservative changes where amino acid  
124 properties are retained (e.g. change between two hydrophobic amino acids), a further  
125 30% represented polar - hydrophobic substitutions, while changes between charged  
126 amino acids were rare (<10% of DCPs) (Supplementary Table 1).

127 DCPs are enriched in six of the SARS-CoV-2 proteins, spike (S), 3a, p6, nsp2,  
128 nsp3 (papain-like protease) and nsp4 with 19.4%, 21.5%, 28.6%, 28.6%, 21.3% and  
129 18.8% of their residues being DCPs respectively (Table 1). In contrast, very few DCPs  
130 were observed in the envelope (E) protein and most of remaining non-structural  
131 proteins encoded by ORF1ab, for example 0.5% of residues in the helicase and 2%  
132 of residues in the RNA-directed RNA polymerase, 2'-O-Methyltransferase, nsp8 and  
133 nsp9 are DCPs (Table 1).

134 The availability of structures of both SARS-CoV and some SARS-CoV-2  
135 proteins, coupled with the ability to model some of the remaining proteins (ref to  
136 methods and supplementary table) enabled us to map 525 DCPs onto protein

137 **Table 1.** Specificity Determining Positions (DCPs) identified between SARS-CoV and  
138 SARS-CoV-2.

| Protein (SARS-CoV) | Protein (SARS-CoV-2) | Sequences Dataset | in | Protein Length (SARS-CoV) | DCPs Identified | % of Residues DCPs |
|--------------------|----------------------|-------------------|----|---------------------------|-----------------|--------------------|
| S                  | S                    | 1326              |    | 1255                      | 243             | 19.4               |
| 3a                 | ORF3a                | 1377              |    | 274                       | 59              | 21.5               |
| 3b                 |                      | n/a               |    | 154                       |                 |                    |
| E                  | E                    | 1377              |    | 76                        | 3               | 4.0                |
| M                  | M                    | 1372              |    | 221                       | 16              | 7.2                |
| 6                  | 6                    | 1380              |    | 63                        | 18              | 28.6               |
| 7a                 | 7a                   | 1376              |    | 122                       | 11              | 9.0                |
| 7b                 | 7b                   | n/a               |    | 44                        | NA              |                    |
| 8a/8b              | 8                    | 21                |    | 39/84                     | NA              | NA                 |
| 9b                 |                      | n/a               |    | 98                        | NA              |                    |
| N                  | N                    | 1379              |    | 422                       | 26              | 6.2                |
|                    | ORF10                | n/a               |    | n/a                       |                 |                    |
| nsp1               | nsp1                 | 1288              |    | 180                       | 22              | 12.2               |
| nsp2               | nsp2                 | 1288              |    | 636                       | 182             | 28.6               |
| Nsp3               | nsp3                 | 1288              |    | 1922                      | 409             | 21.3               |
| nsp4               | nsp4                 | 1288              |    | 500                       | 94              | 18.8               |
| nsp5               | nsp5                 | 1288              |    | 306                       | 10              | 3.3                |
| nsp6               | nsp6                 | 1288              |    | 290                       | 36              | 12.4               |
| nsp7               | nsp7                 | 1288              |    | 83                        | 1               | 1.2                |
| nsp8               | nsp8                 | 1288              |    | 198                       | 6               | 3.0                |
| nsp9               | nsp9                 | 1288              |    | 113                       | 3               | 2.7                |
| nsp10              | nsp10                | 1288              |    | 139                       | 4               | 2.9                |
| nsp12              | nsp12                | 1281              |    | 932                       | 22              | 2.4                |
| nsp13              | nsp13                | 1281              |    | 601                       | 3               | 0.5                |
| nsp14              | nsp14                | 1281              |    | 527                       | 29              | 5.5                |
| nsp15              | nsp15                | 1281              |    | 346                       | 32              | 9.3                |
| nsp16              | nsp16                | 1281              |    | 298                       | 14              | 4.7                |
|                    |                      |                   |    |                           |                 |                    |
| Total              |                      |                   |    |                           | 1243            | 13.1               |

139 structures (Supplementary Figure 1, Supplementary Table 1). Overall, nearly all of the  
140 mapped DCPs occur on the protein surface (92%), with only 40 DCPs buried within  
141 the protein, primarily in S and the papain-like protease (nsp3) (Supplementary Table  
142 1). Based on our structural analysis, we propose that 45 DCPs are likely to result in  
143 structural (or functional) differences between SARS-CoV and SARS-CoV-2 proteins.  
144 A further 222 could result in some change, with our analysis suggesting that the  
145 remaining 258 DCPs seem unlikely to have a substantial effect on protein structure  
146 and function.  
147  
148  
149

### 150 **Differentially conserved positions (DCPs) in interferon antagonists**

151 At least 10 SARS-CoV proteins have roles in interferon antagonism [Totura and  
152 Baric, 2012]. Two of these proteins, p6 and the papain-like protease (nsp3), are  
153 enriched in DCPs, two are depleted in DCPs (nsp7 and nsp16), five have intermediate  
154 proportions of DCPs (nsp14, nsp1, nsp15, N and M), while p3b is not encoded by  
155 SARS-CoV-2. Initial studies have identified a difference in the interferon inhibition  
156 between SARS-CoV and SARS-CoV-2 [Lokugamage et al., 2020], so it is possible  
157

158 that the DCPs identified in these proteins, especially in p6 and the papain-like  
159 protease, may have an effect on interferon inhibition.  
160

## 161 **S (Spike) protein**

162 The most interesting changes were detected in the spike (S) protein, which  
163 mediates coronavirus entry into host cells [Cui et al., 2019; Chen et al., 2020b]. SARS-  
164 CoV-2 S is 77.46% sequence identical to the SARS-CoV S and most of the remaining  
165 positions are DCPs (243 residues, 1%) (Table 1). SARS-CoV entry depends on the  
166 cleavage of S by transmembrane serine protease 2 (TMPRSS2), the endosomal  
167 cysteine protease cathepsin L, and/ or other cellular proteases, with residues R667  
168 and R797 being critical cleavage sites [Matsuyama et al., 2010; Simmons et al., 2013;  
169 Zhou et al., 2015; Reinke et al., 2017; Iwata-Yoshikawa et al., 2019]. Serine protease  
170 inhibitors such as camostat and nafamostat interfere with S cleavage by TMPRSS2  
171 and virus uptake [Kawase et al., 2012; Yamamoto et al., 2016; Zhou et al., 2015; Shin  
172 & Seong, 2017]. R667 and R797 are conserved in SARS-CoV-2 (R685 and R815).  
173 However, there is a four amino acid insertion in SARS-CoV-2 S prior to R685 and  
174 many of the residues close to R685 are DCPs (V663=Q677, S664=T678, T669=V687,  
175 S670=A688, Q671=S689, DCPs are represented by the SARS CoV residue followed  
176 by the SARS-CoV-2 residue) (Figure 1A). There is greater conservation around the  
177 R815 cleavage site with only two DCPs in close proximity (L792=S810, T795=S813)  
178 (Figure 1A).

179 The SARS-CoV S receptor binding domain (residues 306-527, equivalent to  
180 328-550 in SARS-CoV-2) is enriched in DCPs, containing 51 DCPs (23% of residues).  
181 Eleven of the 24 SARS-CoV S residues in direct contact with ACE2 were DCPs (Figure  
182 1A, Supplementary Table 2). Analysis of the DCPs using the SARS-CoV and SARS-  
183 CoV-2 S protein complexes with ACE2 [Song et al., 2018; Yan et al., 2020] identified  
184 runs of DCPs (A430-T433, F460-A471) in surface loops forming part of the S-ACE2  
185 interface and resulted in different conformations in SARS-CoV-2 S compared to  
186 SARS-CoV S (Figure 1B). Two DCPs remove intramolecular hydrogen bonding within  
187 the spike protein in SARS-CoV-2 (Supplementary Table 2) and three DCPs  
188 (R426=N439, N479=QQ493, Y484=Q498) are residues that form hydrogen bonds  
189 with ACE2. For two of these positions, hydrogen bonding with ACE2 is present with  
190 both S proteins, but for R426=N439 hydrogen bonding with ACE2 is only observed  
191 with SARS-CoV S. N439 in SARS-CoV-2 S is not present in the interface and the  
192 sidechain points away from the interface (Figure 1D). Further, analysis of the SARS-  
193 CoV-2 S-ACE2 complex highlighted important roles of the V404=K417 DCP, where  
194 K417 in SARS-CoV-2 S is able to form a salt bridge with ACE2 D30 (Figure 1C) [Yan  
195 et al., 2020].

196 Alanine scanning [Chakraborti et al., 2005] and adaptation experiments [Wan  
197 et al., 2020] have identified 16 SARS-CoV S residues associated with determining the  
198 binding affinity with ACE2. For all five residues identified from adaptation studies and  
199 four of the 11 identified by alanine scanning experiments different amino acids are  
200 present in SARS-CoV-2 S (Figure 1E), highlighting the difference in the interaction  
201 with ACE2.

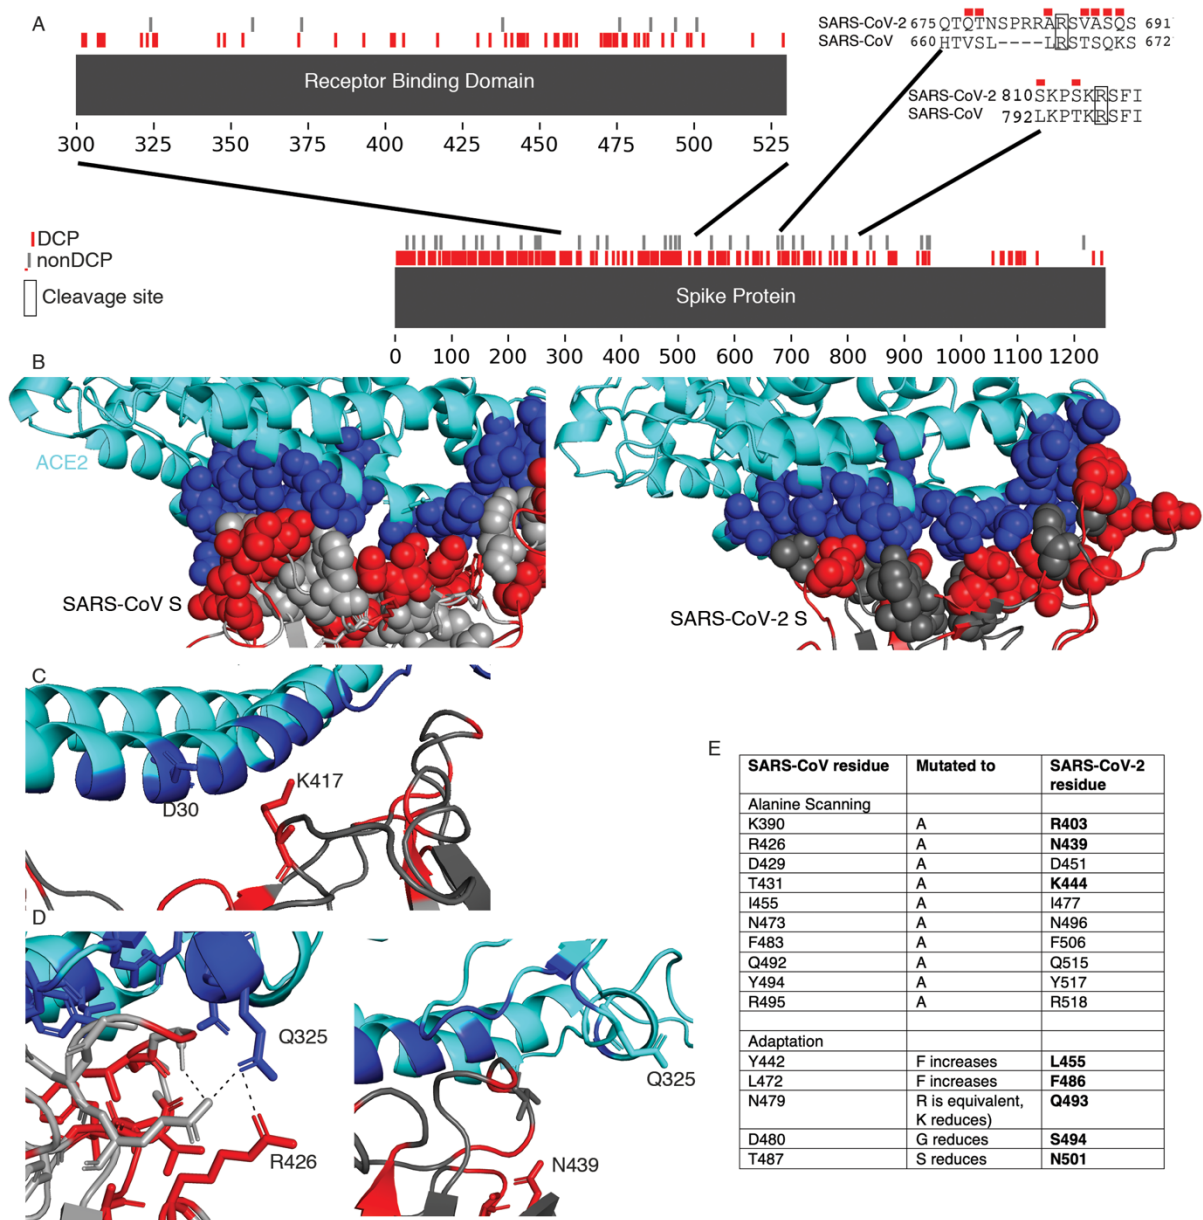

202  
 203 **Figure 1.** Differentially conserved positions in the Spike protein. A) A sequence view  
 204 of the DCPs present in the Spike protein, with insets showing the receptor binding  
 205 domain and the two cleavage sites. B) The S interface with ACE2 (cyan). The ACE2  
 206 interface is shown in blue spheres, DCPs in red. C) The V404=K417 DCP. D) The  
 207 R426=N439 DCP, the left image shows SARS-CoV S R426, the image on the right  
 208 show the equivalent N439 in SARS-CoV-2 S. E) SARS-CoV residues associated with  
 209 altering ACE2 affinity and the residues at these positions in SARS-CoV-2 S.

210  
 211 **SARS-CoV-2 replication in different cell lines**

212 In further experiments, we investigated to see the extent to which the  
 213 substantial number of amino acid positions that are differently conserved between  
 214 SARS-CoV and SARS-CoV-2, result in different phenotypes. Infection experiments  
 215 using the four colorectal cancer cell lines Caco2, CL14, HT-29, and DLD-1 resulted in  
 216 similar susceptibility profiles. Replication of both viruses was detected in Caco2 and  
 217 CL14 cells, but not in HT-29 or DLD-1 cells, as shown by cytopathogenic effects (CPE)

218 (Figure 2A), staining for double-stranded RNA (Figure 2B), and viral genomic RNA  
 219 levels (Figure 2C). These findings are in line with previous findings showing that Caco2  
 220 and CL14 cells are susceptible to SARS-CoV infection [Cinatl et al., 2004] and the  
 221 previous isolation of SARS-CoV-2 cells in Caco2 cells [Hoehl et al., 2020]. Moreover,  
 222 we identified CL14 as an additional model to study SARS-CoV-2 infection and  
 223 replication.  
 224

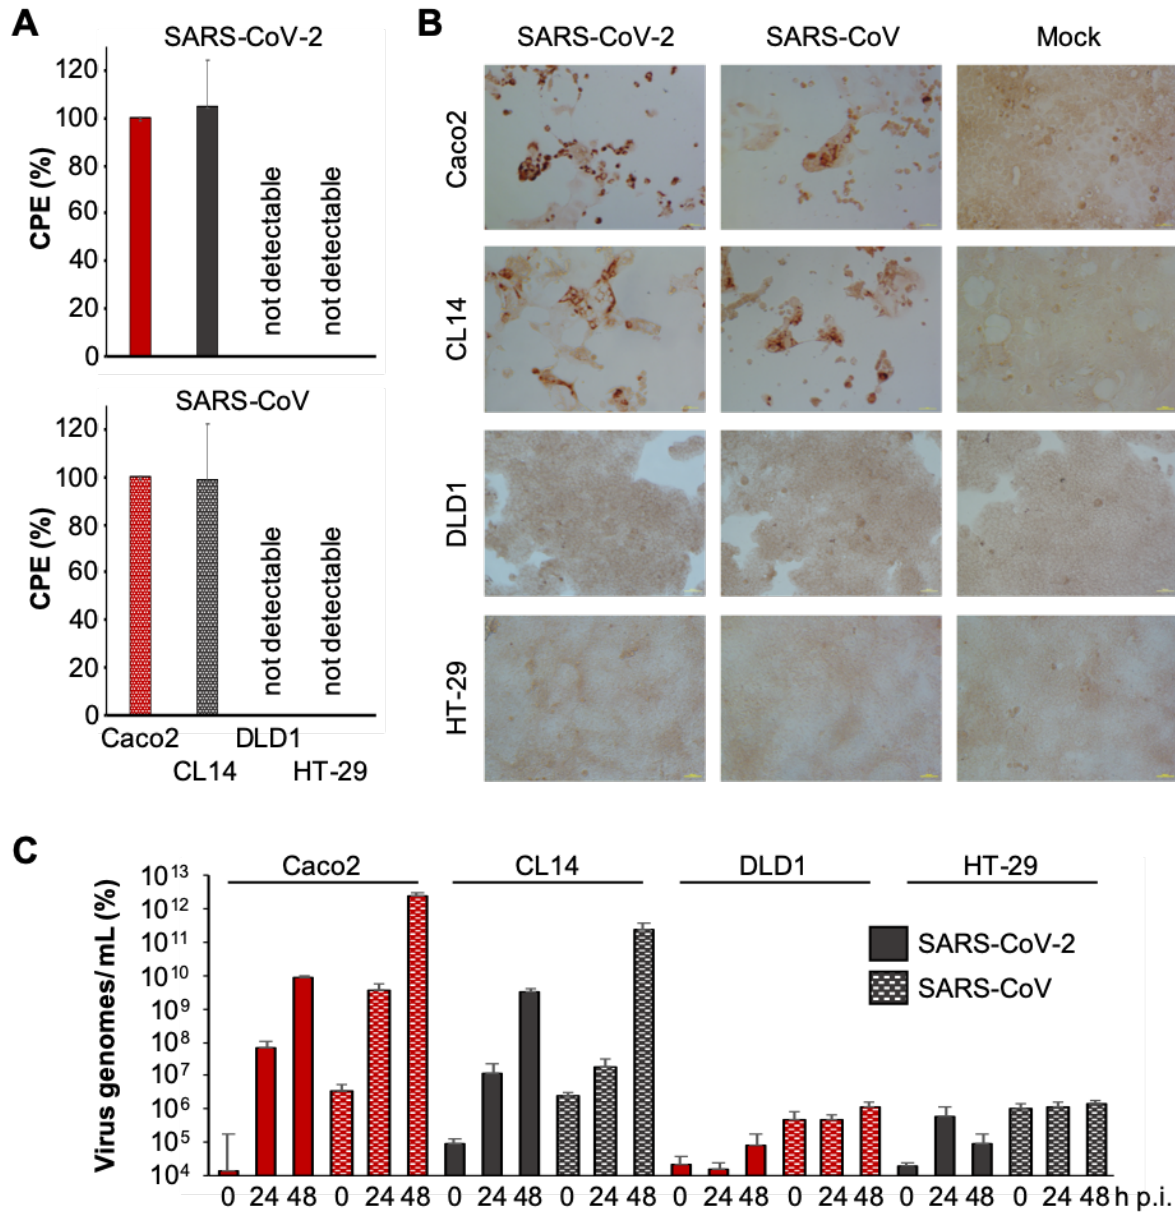

225  
 226 **Figure 2.** SARS-CoV-2 and SARS-CoV susceptibility of colorectal cancer cell lines.  
 227 A) Cytopathogenic effect (CPE) formation 48h post infection in MOI 0.01-infected  
 228 cells. B) Representative images showing MOI 0.01-infected cells immunostained for  
 229 double-stranded RNA 48h post infection. C) Quantification of virus genomes by qPCR  
 230 at different time points post infection (p.i.).  
 231  
 232



233 **SARS-CoV-2 infection does not correlate with the cellular ACE2 status**

234         Although ACE2 was identified as a SARS-CoV-2 receptor [Hoffmann et al.,  
235 2020; Letko et al., 2020; Walls et al., 2020; Wan et al., 2020; Wrapp et al., 2020; Yan  
236 et al., 2020; Zhou et al., 2020], there was no correlation between the cellular ACE2  
237 levels and the cellular susceptibility to SARS-CoV-2 (and SARS-CoV) (Figure 3A).  
238 CL14 cells displayed lower ACE2 levels than both HT-29 and DLD-1 (Figure 3A),  
239 although CL14 was, in contrast to HT-29 and DLD-1, permissive to SARS-CoV-2 (and  
240 SARS-CoV) infection (Figure 2). This suggests that there are other factors in addition  
241 to the cellular ACE2 levels that determine cellular susceptibility to SARS-CoV-2 and  
242 SARS-CoV.

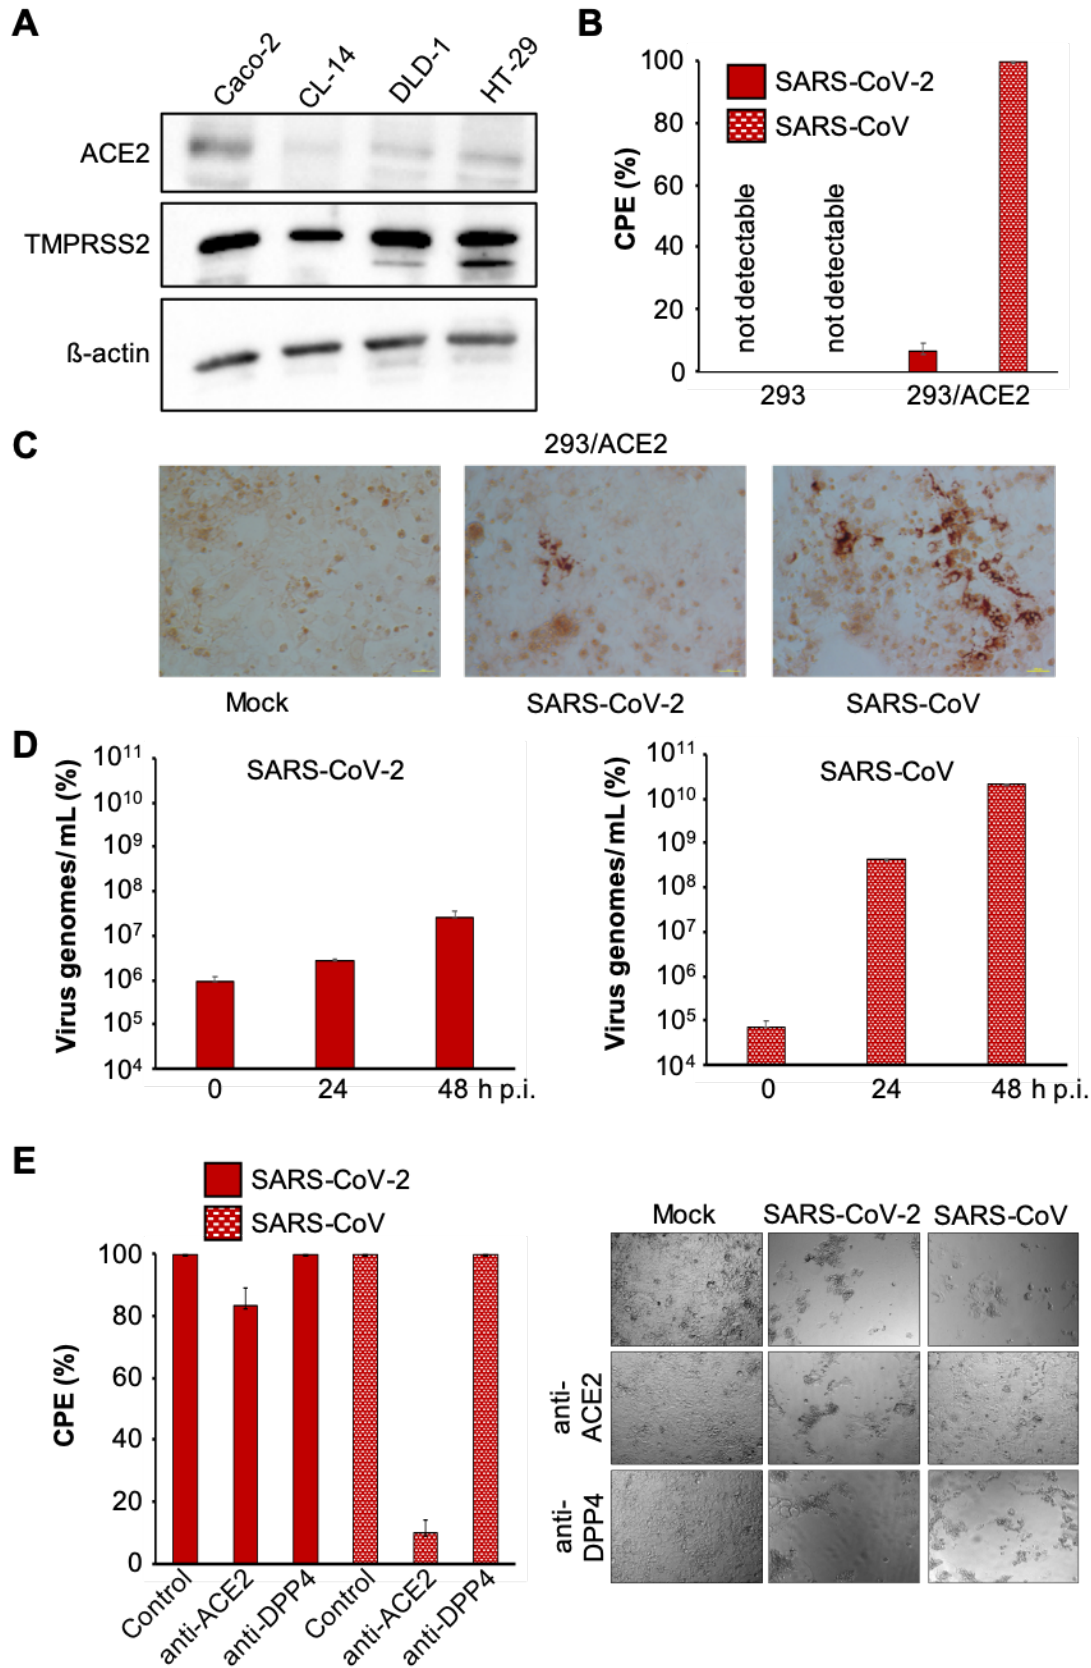

243  
244  
245  
246  
247

**Figure 3.** N A) Western blots indicating cellular ACE2 and TMPRSS2 protein levels. B) CPE formation in SARS-CoV and SARS-CoV-2 (MOI 0.01)-infected ACE2-negative 293 cells and 293 cells stably expressing ACE2 cells (293/ACE2) 48h post

248 infection. C) Immunostaining for double-stranded RNA in SARS-CoV-2 and SARS-  
249 CoV (MOI 0.01)-infected 293/ACE2 cells 48h post infection. D) Quantification of virus  
250 genomes by qPCR in SARS-CoV-2 and SARS-CoV (MOI 0.01)-infected 293/ACE2  
251 cells 48h post infection. E) Cytopathogenic effect (CPE) formation in SARS-CoV-2 and  
252 SARS-CoV (MOI 0.01)-infected Caco2 cells in the presence of antibodies directed  
253 against ACE2 or DPP4 (MERS-CoV receptor) 48h post infection.  
254

### 255 **ACE2 expression mediates 293 cell susceptibility to SARS-CoV but not to SARS-** 256 **CoV-2**

257 Next, we compared SARS-CoV-2 and SARS-CoV replication dependence on  
258 ACE2 in an additional model. 293 cells are not susceptible to SARS-CoV infection due  
259 to a lack of ACE2 expression. However, 293 cells that stably express ACE2  
260 (293/ACE2) support SARS-CoV infection [Kamitani et al., 2006]. As expected,  
261 infection of 293 cells with SARS-CoV or SARS-CoV-2 did not result in detectable  
262 cytopathogenic effect (CPE) (Figure 3B), but a SARS-CoV-induced CPE was detected  
263 in 293/ACE2 cells (Figure 3B). In contrast to SARS-CoV, however, 293/ACE2 cells  
264 displayed limited permissiveness to SARS-CoV-2 infection (Figure 3B). Staining for  
265 double-stranded RNA (Figure 3C) and detection of viral genomic RNA copies (Figure  
266 3D) confirmed reduced SARS-CoV-2 infection of and replication in 293/ACE2 cells  
267 relative to SARS-CoV. These findings further suggest that there are differences in the  
268 host cell factors that mediate SARS-CoV and SARS-CoV-2 susceptibility and in turn  
269 differences in the cell tropisms.  
270

### 271 **Reduced activity of anti-ACE2 antibody against SARS-CoV-2 compared to** 272 **SARS-CoV**

273 Antibodies directed against ACE2 have been shown to inhibit SARS-CoV  
274 replication [Li et al., 2003]. In agreement, an anti-ACE2 antibody inhibited SARS-CoV  
275 infection in Caco2 cells (Figure 3E). However, the anti-ACE2 antibody displayed  
276 limited activity against SARS-CoV-2 infection (Figure 3E). This is in agreement with  
277 previous findings indicating a stronger binding affinity of SARS-CoV-2 S to ACE2  
278 compared to SARS-CoV S [Walls et al., 2020; Wrapp et al., 2020], which may be more  
279 difficult to antagonise using anti-ACE2 antibodies. As anticipated, antibodies directed  
280 against DPP4, the MERS-CoV receptor [de Wit et al., 2016; Cui et al., 2019], did not  
281 interfere with SARS-CoV or SARS-CoV-2 infection (Figure 3E).  
282

### 283 **SARS-CoV-2 is more sensitive to TMPRSS2 inhibitors than SARS-CoV**

284 SARS-CoV S and SARS-CoV-2 S are cleaved and activated by TMPRSS2  
285 (transmembrane serine protease 2) [Matsuyama et al., 2010; Hoffmann et al., 2020;  
286 Matsuyama et al., 2020]. Notably, all four cell lines, which we had tested for  
287 susceptibility to SARS-CoV-2 replication, displayed similar TMPRSS2 levels (Figure  
288 3A). Hence, cellular permissiveness to SARS-CoV-2 infection is determined by further  
289 host cell factors in addition to TMPRSS2 and ACE2.

290 Previous findings had shown that the serine protease inhibitor camostat, which  
291 is approved for the treatment of chronic pancreatitis in Japan [Ramsey et al., 2019],  
292 inhibits both SARS-CoV and SARS-CoV-2 cell entry via interference with TMPRSS2-  
293 mediated S cleavage [Kawase et al., 2012; Zhou et al., 2015; Hoffmann et al., 2020].  
294 Camostat inhibited cell entry of VSV pseudotypes bearing SARS-CoV-2 S in a  
295 concentration-dependent manner [Hoffmann et al., 2020]. Control experiments using  
296 wild-type virus were only performed using a single high camostat concentration of 100  
297  $\mu\text{M}$ . Here, we directly compared the concentration-dependent effects of camostat on

298 SARS-CoV-2- and SARS-CoV-induced CPE formation in Caco2 cells (Figure 4A).  
299 Camostat displayed nearly 14-fold increased activity against SARS-CoV-2  
300 (concentration that inhibits CPE formation by 50%,  $IC_{50}$  1.20 $\mu$ M) compared to SARS-  
301 CoV ( $IC_{50}$  16.7 $\mu$ M) (Figure 4A). Nafamostat is an alternative serine protease inhibitor,  
302 which is approved for pancreatitis and [Minakata et al., 2019; Hirota et al., 2020] and  
303 has been shown to exert superior effects against MERS-CoV compared to camostat  
304 [Yamamoto et al., 2016].

305 Nafamostat displayed higher activity against SARS-CoV-2 CPE formation ( $IC_{50}$   
306 0.49 $\mu$ M) than camostat, but similar activity against SARS-CoV (18.9 $\mu$ M) (Figure 4A).  
307 Therapeutic plasma levels for both compounds were described to reach about 0.2 $\mu$ M  
308 [Hiraku et al., 1982; Cao et al., 2008], which is below the antivirally active  
309 concentrations. Moreover, although both compounds inhibited SARS-CoV-2-induced  
310 CPE formation, they displayed limited effects on the SARS-CoV-2 replication cycle as  
311 indicated by high levels of double-stranded RNA in both nafamostat- and camostat-  
312 treated SARS-CoV-2-infected cells (Figure 4B). Hence, both camostat and nafamostat  
313 may primarily exert cytoprotective effects in SARS-CoV-2-infected cells, which inhibit  
314 syncytium formation and cell lysis, but may not inhibit SARS-CoV-2 replication in the  
315 same way.

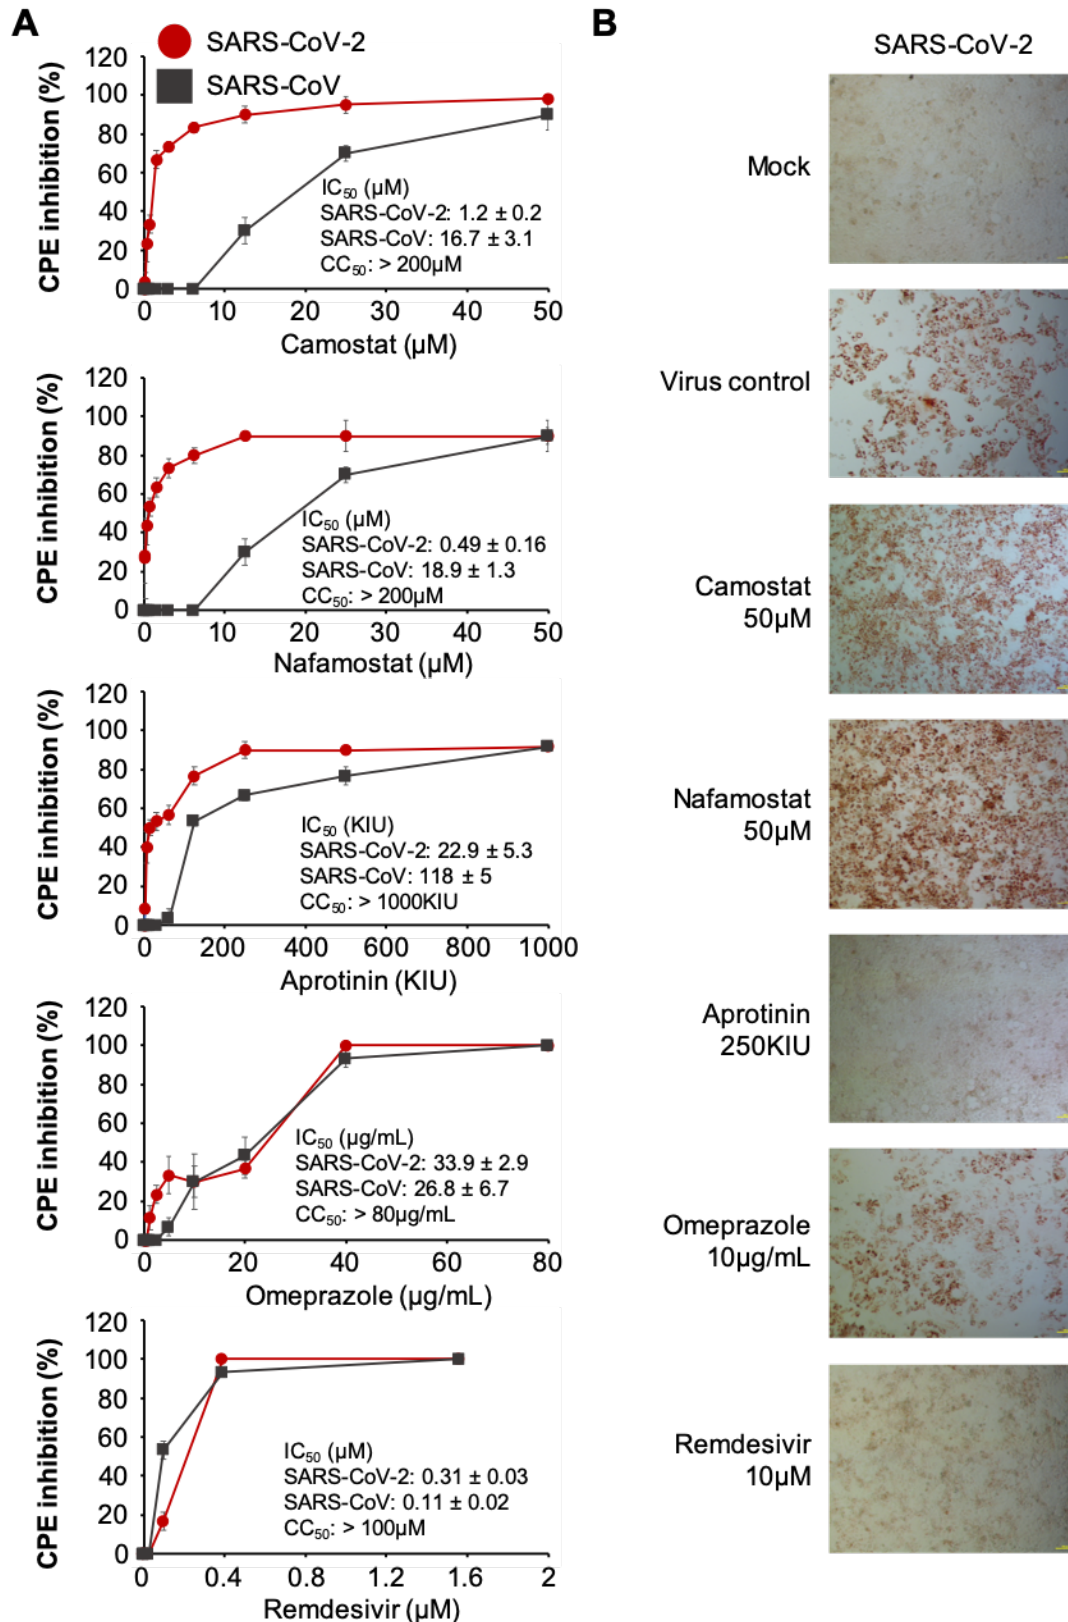

316  
317  
318  
319  
320  
321

**Figure 4.** Anti-SARS-CoV-2 effects of antiviral drug candidates. A) Concentration-dependent effects of drug candidates on SARS-CoV-2- and SARS-CoV-induced cytopathogenic effect (CPE) formation determined 48h post infection in Caco2 cells infected at an MOI of 0.01. B) Immunostaining for double-stranded RNA in drug-treated SARS-CoV-2 (MOI 0.01)-infected cells 48h post infection. Camostat and

322 nafamostat prevent SARS-CoV-2-mediated cell lysis but are characterised by high  
323 levels of double-stranded RNA.

324 Aprotinin is a further serine protease inhibitor that has been previously  
325 investigated against influenza viruses [Zhirnov et al., 2011; Shen et al., 2017]. It is  
326 used to reduce blood loss during surgery and for pancreatitis [Moggia et al., 2017;  
327 Kapadia et al., 2019]. The efficacy of aprotinin is measured in kallikrein inhibitor units  
328 (KIU) [Levy et al., 1994; Zhirnov et al., 2011]. Like the other serine protease inhibitors,  
329 aprotinin was also more effective against SARS-CoV-2-induced CPE formation ( $IC_{50}$   
330 22.9 KIU/mL) than against SARS-CoV ( $IC_{50}$  118 KIU/mL) (Figure 4A). In addition and  
331 in contrast to nafamostat and camostat, aprotinin also inhibited double-stranded RNA  
332 formation in SARS-CoV-2-infected cells (Figure 4B). Therapeutic aprotinin plasma  
333 levels were described to reach  $147 \pm 61$  KIU/mL after the administration of 1,000,000  
334 KIU [Levy et al., 2019]. Moreover, an aerosol preparation of aprotinin is approved for  
335 the treatment of influenza in Russia [Zhirnov et al., 2011]. Since aprotinin interferes  
336 with SARS-CoV-2 in therapeutic concentrations and displays more pronounced direct  
337 antiviral effects than camostat and nafamostat, it seems to have a greater potential for  
338 the treatment of SARS-CoV-2-infected individuals based on our data.

339  
340

#### 341 **Testing of additional antiviral drug candidates**

342 To investigate whether there are also differences in the drug sensitivity profiles  
343 of SARS-CoV-2 and SARS-CoV to other antiviral drug candidates, we tested two  
344 further compounds (Figure 4A). Previous research had shown that  
345 hydroxychloroquine and ammonium chloride interfere with SARS-CoV and SARS-  
346 CoV-2 replication, as lysosomotropic agents that increase the pH in lysosomes [Talbot  
347 and Vance, 1980; Randolph and Stollar, 1990; Touret and de Lamballerie, 2020; Wang  
348 et al., 2020; Hoffmann et al., 2020]. Proton pump inhibitors including omeprazole may  
349 also inhibit virus replication by lysosomotropic and/ or other mechanisms [Dowall et  
350 al., 2016; Strickland et al., 2017; Watanabe et al., 2020]. Thus, we included  
351 omeprazole in our study. Moreover, we tested remdesivir, a drug that was developed  
352 for the treatment of flavivirus infections and displayed activity against a range of RNA  
353 viruses [Beigel et al., 2019; Hoenen et al., 2019]. Most recently, remdesivir was found  
354 to inhibit MERS-CoV and SARS-CoV-2 and suggested as a therapy candidate for  
355 SARS-CoV-2 infection [de Wit et al., 2020; Sheahan et al., 2020; Wang et al., 2020].  
356 Currently (as of 31<sup>st</sup> March 2020), there are eight active clinical trials investigating  
357 remdesivir for SARS-CoV-2-infected individuals ([www.clinicaltrials.gov](http://www.clinicaltrials.gov)). Omeprazole  
358 inhibited both viruses in similar concentrations, and SARS-CoV was more sensitive to  
359 remdesivir than to SARS-CoV-2 (Figure 4A). Both omeprazole and remdesivir also  
360 inhibited the formation of double-stranded RNA (Figure 4B)

361

#### 362 **Omeprazole increases the anti-SARS-CoV-2 activity of remdesivir and aprotinin**

363 Omeprazole is a well-tolerated drug and a promising candidate for drug  
364 repurposing strategies [Ikemura et al., 2017]. However, the omeprazole  
365 concentrations that interfered with SARS-CoV-2 CPE formation ( $IC_{50}$  34 $\mu$ M) was  
366 beyond therapeutic omeprazole plasma concentrations reported to reach about 8 $\mu$ M  
367 [Shin & Kim, 2013]. We have recently shown that omeprazole increases the antiviral  
368 activity of acyclovir [Michaelis et al., 2019]. Here, we combined both aprotinin and  
369 remdesivir with a fixed omeprazole concentration of 8 $\mu$ M, which resulted in further  
370 increased activity against CPE formation (aprotinin 2.7-fold, remdesivir 10-fold)  
371 (Figure 5A) and double-stranded RNA formation (Figure 5B). Hence, combinations of

372 aprotinin and remdesivir with omeprazole may represent therapy candidates for the  
373 treatment of SARS-CoV-2-associated disease.

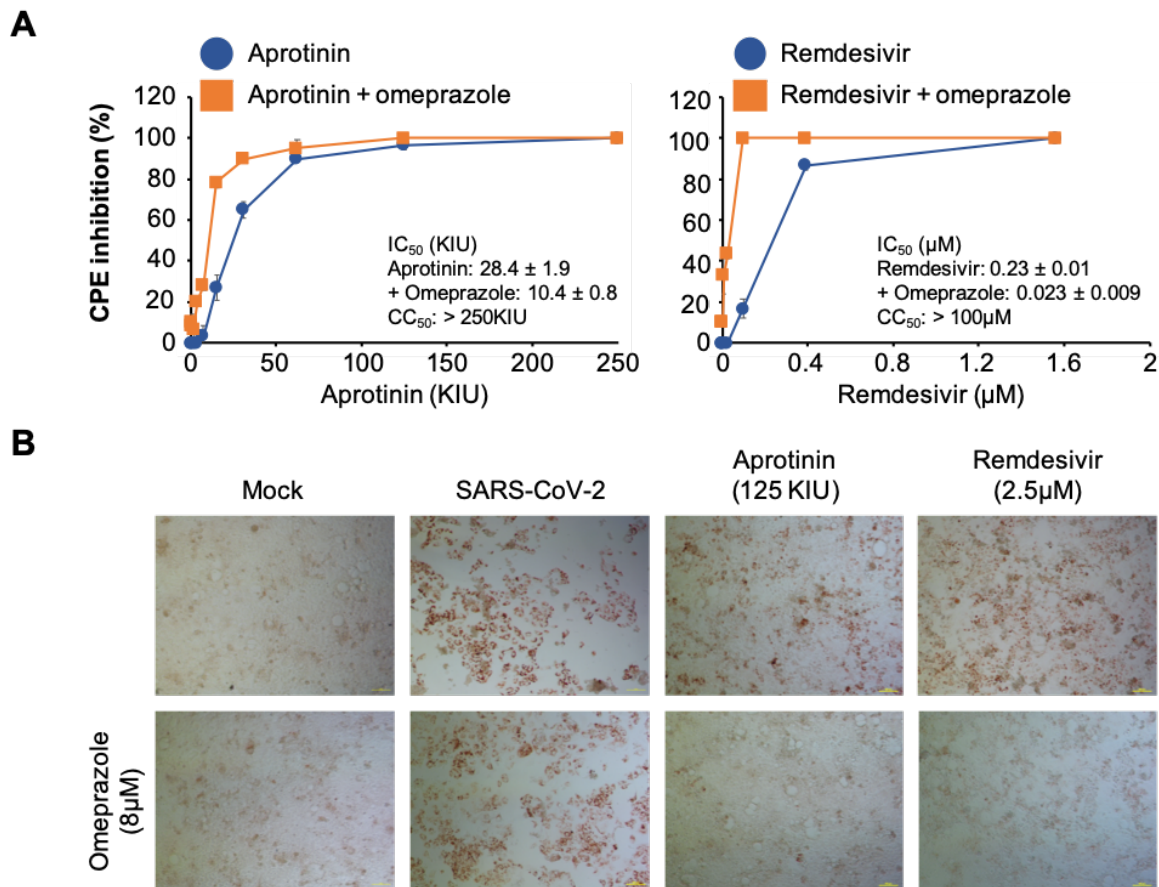

374 **Figure 5.** Anti-SARS-CoV-2 effects of omeprazole in combination with aprotinin and  
375 remdesivir. A) Effect of omeprazole 8μM on cytopathogenic effect (CPE) formation in  
376 combination with aprotinin and remdesivir in SARS-CoV-2 (MOI 0.01)-infected Caco2  
377 cells 48h post infection. B) Immunostaining for double-stranded RNA indicating  
378 combined effects of aprotinin and remdesivir in combination with omeprazole in SARS-  
379 CoV-2 (MOI 0.01)-infected Caco2 cells 48h post infection.  
380

## 381 Discussion

382 Here, we performed an in-silico analysis of the effects of differentially  
383 conserved amino acid positions (DCPs) between SARS-CoV-2 and SARS-CoV  
384 proteins on virus protein structure and function in combination with a comparison of  
385 wild-type SARS-CoV-2 and SARS-CoV in cell culture.

386 Our analysis identified 1243 DCPs, which represents 89% of the amino acid  
387 positions that differ between SARS-CoV-2 and SARS-CoV and nearly 13% of all  
388 residues encoded by the SARS-CoV genome. 258 of these DCPs (2.6% of all  
389 residues) are likely to have a structural and functional impact. The DCPs are not  
390 equally distributed between the proteins. DCPs are enriched in S, 3a, p6, nsp2,  
391 papain-like protease, and nsp4, but very few DCPs are present in the envelope (E)  
392 protein and most of the remaining non-structural proteins encoded by ORF1ab. This  
393 indicates that the individual proteins differ in their tolerance to sequence changes and/  
394 or their exposure to selection pressure exerted by the host environment.

395 This large proportion of DCPs reflects the differences in the clinical behaviour  
396 of SARS-CoV-2 and SARS-CoV. The mortality associated with SARS-CoV is  
397 substantially higher than that associated with SARS-CoV-2 ([www.who.int](http://www.who.int)) [Dong et  
398 al., 2020; Nishiura et al., 2020a; Pan et al., 2020; Rothe et al., 2020]. While SARS-  
399 CoV causes a disease of the lower respiratory tract, and infected individuals are only  
400 contagious when they experience severe symptoms [de Wit et al., 2016], SARS-CoV-  
401 2 is present in the upper respiratory tract and seems to be readily transmitted via  
402 droplets and direct contact prior to the onset of symptoms. Moreover, mild but  
403 infectious cases may substantially contribute to its spread [Li et al., 2020; Rothe et al.,  
404 2020; Yang et al., 2020; Yu et al., 2020]. Further research will be required to elucidate  
405 in detail, which DCPs are responsible for which differences in virus behaviour.

406 However, we have already identified a number of differences between SARS-  
407 CoV-2 and SARS-CoV, with regard to their cell tropism and drug sensitivity profiles.  
408 Both viruses use ACE2 as a receptor and are activated by the transmembrane serine  
409 protease TMPRSS2 [Li et al., 2003; Matsuyama et al., 2010; Cui et al., 2019;  
410 Hoffmann et al., 2020; Letko et al., 2020; Lu et al., 2020; Matsuyama et al., 2020; Wals  
411 et al., 2020; Wan et al., 2020; Wetko et al., 2020; Wrapp et al., 2020; Yan et al., 2020;  
412 Zhou et al., 2020]. Our results show, however, that the ACE2 and the TMPRSS2 status  
413 are not sufficient to predict cells susceptibility to SARS-CoV-2 or SARS-CoV. We  
414 found that the colorectal cancer cell line CL14 supported SARS-CoV-2 replication,  
415 although it displayed lower ACE2 levels and similar TMPRSS2 levels to the non-  
416 susceptible cell lines DLD-1 and HT29. Hence CL14 represents a novel additional  
417 model for the studying of SARS-CoV-2 replication. Notably, attempts to identify SARS-  
418 CoV-2 target cells based on the ACE2 status [Luan et al., 2020; Qiu et al., 2020; Xu  
419 et al., 2020] need to be considered with caution in the light of our current findings.

420 As previously described [Kamitani et al., 2006], ACE2 expression rendered  
421 SARS-CoV non-permissive 293 cells susceptible to SARS-CoV. However, the effects  
422 of ACE2 expression had a substantially lower impact on SARS-CoV-2 infection,  
423 indicating differences in other host cell determinants of SARS-CoV and SARS-CoV-2  
424 susceptibility. Moreover, an anti-ACE2 antibody displayed higher efficacy against  
425 SARS-CoV than against SARS-CoV-2. This may be explained by an increased SARS-  
426 CoV-2 S affinity to ACE2 compared to SARS-CoV S [Wrapp et al., 2020], which may  
427 be more difficult to antagonise.

428 The serine protease inhibitors camostat, nafamostat, and aprotinin inhibited  
429 both SARS-CoV-2 and SARS-CoV CPE formation. In contrast to aprotinin, camostat,



430 and nafamostat exerted limited activity against double-stranded RNA formation in  
431 SARS-CoV-2-infected cells. This may indicate that camostat and nafamostat rather  
432 exert cytoprotective effects that prevent cells from virus-induced lysis but less  
433 pronounced antiviral activity. The mechanisms underlying the enhanced anti-SARS-  
434 CoV-2 activity of aprotinin remain unclear. Differences in the interference with  
435 additional proteases involved in SARS-CoV-2 replication may be responsible. Notably,  
436 aprotinin had been identified in the past as a protease inhibitor with pronounced  
437 antiviral activity, which may interfere with viral proteases in addition to cellular ones  
438 [Hayashi et al., 1991; Aleshin et al., 2007; Zhirnov et al., 2011; Lin et al., 2017].

439 Notably, SARS-CoV-2 was more sensitive to aprotinin than SARS-CoV, which  
440 may be at least in part explained by the DCPs observed in the vicinity of the cleavage  
441 sites in S. Effective aprotinin concentrations were in the range of clinically achievable  
442 concentrations. Moreover, aprotinin aerosols, which may result in increased local drug  
443 concentrations in the lungs are approved for the treatment of influenza viruses in  
444 Russia [Zhirnov et al., 2011]. Remdesivir, a broad spectrum antiviral agent under  
445 investigation in clinical trials for the treatment of SARS-CoV-2 patients  
446 ([www.clinicaltrials.gov](http://www.clinicaltrials.gov)), exerted stronger effects against SARS-CoV than against  
447 SARS-CoV-2.

448 Therapeutic concentrations of the proton pump inhibitor omeprazole further  
449 increased the activity of aprotinin and remdesivir. Omeprazole may interfere with the  
450 acidification of the lysosomes, which is required to support coronavirus replication  
451 [Shen et al., 2017]. However, other, so far unknown, mechanisms may also contribute  
452 to this. Notably, omeprazole and other proton pump inhibitors have recently been  
453 shown to increase the anti-herpes simplex virus activity of acyclovir [Michaelis et al.,  
454 2019].

455 In conclusion, our in-silico study revealed a substantial number of differentially  
456 conserved amino acid positions in the SARS-CoV-2 and SARS-CoV proteins. In  
457 agreement, cell culture experiments identified differences in the cell tropism and drug  
458 sensitivity profiles of these two viruses. Our data also show that cellular ACE2 levels  
459 do not reliably indicate cell susceptibility to SARS-CoV-2. Hence, ACE2 expression  
460 studies are not sufficient to predict the SARS-CoV-2 cell tropism. Differences in the  
461 drug sensitivity profiles between SARS-CoV-2 and SARS-CoV, the most closely  
462 related coronavirus known to have caused disease in humans, indicate that  
463 approaches to identify anti-SARS-CoV-2 drugs will require testing against this virus.  
464 Finally, and probably most importantly during an ongoing pandemic, we have shown  
465 that the approved drug aprotinin inhibits SARS-CoV-2 infection in clinically achievable  
466 concentrations. The efficacy of aprotinin (and of remdesivir, which is investigated  
467 against SARS-CoV-2 in clinical trials) can be further enhanced by therapeutic  
468 concentrations of the proton pump inhibitor omeprazole. Hence, our study has  
469 identified novel candidate therapies based on approved drugs that can be readily  
470 tested in a clinical setting.

471 **Methods**

472

473 **Structural analysis**

474 Full genome sequences for SARS-CoV-2 were obtained from the National  
475 Center for Biotechnology Information (NCBI) 4 and the GISAID resource. A total of  
476 1266 full length genome sequences were available as of 27/03/2020. Fifty-three  
477 SARS-CoV genome sequences were downloaded from VIPR [Pickett et al., 2012;  
478 Pickett et al., 2012A] restricted to sequences with a collection year between 2003-  
479 2004 and a human or unknown host. Where the host was unknown the genome  
480 information was further checked to see if it was appropriate. Open Reading Frames  
481 (ORFs) were extracted using EMBOSS getorf [Rice et al., 2000]. These ORFs were  
482 matched to known proteins using BLAST, and fragments and mismatches were  
483 discarded. To match the ORF1ab non-structural proteins, a BLAST database of the  
484 sequences from the SARS non-structural proteins was generated and the SARS-CoV-  
485 2 ORF1ab searched against it. After each ORF was assigned to a known protein they  
486 were aligned using ClustalO [Sievers et al., 2011] with default settings. Sequences  
487 that fell below 50% coverage were removed from analysis.

488 SDPs were identified by calculating the Jensen-Shannon divergence [Capra &  
489 Singh, 2007] score for each position in the multiple sequence alignment in each  
490 species. Highly conserved alignment positions where the conservation score was >0.8  
491 for both species were retained. Any of alignment positions where the same amino acid  
492 occurred in both species were then removed. The remaining residues, were  
493 considered SDPs.

494 All available SARS-CoV-2 and SARS-CoV protein structures were downloaded  
495 from the protein Databank (PDB) [Armstrong et al., 2020]. Where structures were not  
496 available they were modelled using Phyre2 [Kelley et al., 2015] (Supplementary Table  
497 4). SDPs were mapped onto protein structures using PyMOL from structures obtained  
498 from the Protein Databank (PDB). To model the complex between the SARS-CoV-2  
499 spike protein and ACE2, a model of the SARS-CoV-2 spike protein was built using  
500 Phyre2 based on the SARS-CoV structure (PDB:6acg) as some of the residues  
501 involved in binding by the SARS-CoV spike protein were not resolved in the SARS-  
502 CoV-2 spike protein structure. This homology model was docked to ACE2 using  
503 HADDOCK with constraints based on the likely interface residues equivalent to the  
504 SARS-CoV complex.

505

506 **Cell culture**

507 The Caco2 cell line was obtained from DSMZ (Braunschweig, Germany). The  
508 cells were grown at 37°C in minimal essential medium (MEM) supplemented with 10%  
509 foetal bovine serum (FBS), 100 IU/ml penicillin, and 100 µg/ml of streptomycin. 293  
510 cells (PD-02-01; Microbix Biosystems Inc.) and 293/ACE2 cells [Kamitani et al., 2006]  
511 (kindly provided by Shinji Makino, UTMB, Galveston, Texas) were cultured in  
512 Dulbecco's modified Eagle medium (DMEM) supplemented with 10% FBS, 50 IU/ mL  
513 penicillin, and 50µg/ mL streptomycin. Selection of 293/ACE2 cells constitutively  
514 expressing human angiotensin-converting enzyme 2 (ACE2) was performed by  
515 addition of 12 µg/ mL blasticidin. All culture reagents were purchased from Sigma  
516 (Munich, Germany). Cells were regularly authenticated by short tandem repeat (STR)  
517 analysis and tested for mycoplasma contamination.

518

519 **Virus infection**

520 The isolate SARS-CoV-2/1/Human/2020/Frankfurt was derived from an  
521 individual, who had been evacuated from the Hubei province in China, transferred to  
522 University Hospital Frankfurt, and tested positive for SARS-CoV [Hoehl et al., 2020]  
523 and cultivated in Caco2 cells as previously described for SARS-CoV strain FFM-1  
524 [Cinatl et al., 2004]. Virus titres were determined as TCID<sub>50</sub>/ml in confluent cells in 96-  
525 well microtitre plates [Cinatl et al., 2003; Cinatl et al., 2005].  
526

527 **Western blot**

528 Cells were lysed using Triton-X-100 sample buffer, and proteins were  
529 separated by SDS-PAGE. Detection occurred by using specific antibodies against  $\beta$ -  
530 actin (1:2500 dilution, Sigma-Aldrich, Munich, Germany), ACE2, and TMPRSS2 (both  
531 1:1000 dilution, abcam, Cambridge, UK). Protein bands were visualised by laser-  
532 induced fluorescence using infrared scanner for protein quantification (Odyssey, Li-  
533 Cor Biosciences, Lincoln, NE, USA).  
534

535 **Receptor blocking experiments**

536 To investigate whether ACE2 or DPP4 receptors are involved in SARS-CoV-2  
537 internalisation and replication, Caco2 cells were pre-treated for 30 min at 37°C with  
538 goat antibody directed against the human ACE2 or DPP4 ectodomain (R&D Systems,  
539 Wiesbaden-Nordenstadt, Germany). Then, cells were washed three times with PBS  
540 and infected with SARS-CoV-2 at MOI 0.01. Cytopathogenic effects were monitored  
541 48h post infection.  
542

543 **Antiviral assay**

544 Confluent cell cultures were infected with SARS-CoV-2 in 96-well plates at MOI  
545 0.01 in the absence or presence of drug. Cytopathogenic effect (CPE) was assessed  
546 visually 48h post infection [Cinatl et al., 2003].  
547

548 **Viability assay**

549 Cell viability was determined by 3-(4,5-dimethylthiazol-2-yl)-2,5-  
550 diphenyltetrazolium bromide (MTT) assay modified after Mosman [Mosmann, 1983],  
551 as previously described [Onafuye et al., 2019]. Confluent cell cultures in 96-well plates  
552 were incubated with drug for 48h. Then, 25  $\mu$ L of MTT solution (2 mg/mL (w/v) in PBS)  
553 were added per well, and the plates were incubated at 37 °C for an additional 4 h.  
554 After this, the cells were lysed using 200  $\mu$ L of a buffer containing 20% (w/v) sodium  
555 dodecylsulfate and 50% (v/v) N,N-dimethylformamide with the pH adjusted to 4.7 at  
556 37 °C for 4 h. Absorbance was determined at 570 nm for each well using a 96-well  
557 multiscanner. After subtracting of the background absorption, the results are  
558 expressed as percentage viability relative to control cultures which received no drug.  
559 Drug concentrations that inhibited cell viability by 50% (IC<sub>50</sub>) were determined using  
560 CalcuSyn (Biosoft, Cambridge, UK).  
561

562 **qPCR**

563 SARS-CoV-2 and SARS-CoV RNA from cell culture supernatant samples was  
564 isolated using AVL buffer and the QIAamp Viral RNA Kit (Qiagen) according to the  
565 manufacturer's instructions.

566 Absorbance-based quantification of the RNA yield was performed using the  
567 Genesys 10S UV-Vis Spectrophotometer (Thermo Scientific). RNA was subjected to

568 OneStep qRT-PCR analysis using the Luna Universal One-Step RT-qPCR Kit (New  
569 England Biolabs) and a CFX96 Real-Time System, C1000 Touch Thermal Cycler.  
570 Primers were adapted from the WHO protocol<sup>29</sup> targeting the open reading frame for  
571 RNA-dependent RNA polymerase (RdRp): RdRP\_SARSr-F2 (GTG ARA TGG TCA  
572 TGT GTG GCG G) and RdRP\_SARSr-R1 (CAR ATG TTA AAS ACA CTA TTA GCA  
573 TA) using 0.4  $\mu$ M per reaction. Standard curves were created using plasmid DNA  
574 (pEX-A128-RdRP) harbouring the corresponding amplicon regions for RdRP target  
575 sequence according to GenBank Accession number NC\_045512. For each condition  
576 three biological replicates were used. Mean and standard deviation were calculated  
577 for each group.

578

#### 579 **Immunostaining for double-stranded RNA**

580 Immunostaining was performed as previously described [Cinatl et al., 1995],  
581 using a monoclonal antibody directed against double-stranded RNA (1:150 dilution,  
582 SCICONS J2, mouse, IgG2a, kappa chain, English & Scientific Consulting Kft., Szirák,  
583 Hungary) 48h post infection.

584

585 **Acknowledgements**

586 The authors thank Shinji Makino, UTMB, Galveston, TX, for the provision of  
587 293/ACE2 cells.

588

589 **Data availability**

590 All data are provided in the manuscript and its supplements.

591

592 **Author contributions**

593 D.B., J.E.M, K.M., S.G.M., M.N.W., and J.C. performed experiments. V.K.  
594 provided essential materials. All authors analysed data. M.N.W., M.M., and J.C.  
595 planned, conducted, and supervised the study. M.M. wrote the first manuscript draft.  
596 All authors were involved in the drafting of and approved the final manuscript version.

597

598 **References**

- 599 Aleshin AE, Shiryayev SA, Strongin AY, Liddington RC. Structural evidence for  
600 regulation and specificity of flaviviral proteases and evolution of the Flaviviridae fold.  
601 *Protein Sci.* 2007 May;16(5):795-806.
- 602 Armstrong DR, Berrisford JM, Conroy MJ, Gutmanas A, Anyango S, Choudhary P,  
603 Clark AR, Dana JM, Deshpande M, Dunlop R, Gane P, Gáborová R, Gupta D, Haslam  
604 P, Koča J, Mak L, Mir S, Mukhopadhyay A, Nadzirin N, Nair S, Paysan-Lafosse T,  
605 Pravda L, Sehnal D, Salih O, Smart O, Tolchard J, Varadi M, Svobodova-Vařeková R,  
606 Zaki H, Kleywegt GJ, Velankar S. PDBe: improved findability of macromolecular  
607 structure data in the PDB. *Nucleic Acids Res.* 2020 Jan 8;48(D1):D335-D343.
- 608 Beigel JH, Nam HH, Adams PL, Krafft A, Ince WL, El-Kamary SS, Sims AC. Advances  
609 in respiratory virus therapeutics - A meeting report from the 6th isirv Antiviral Group  
610 conference. *Antiviral Res.* 2019 Jul;167:45-67.
- 611 Borges do Nascimento IJ, Cacic N, Abdulazeem HM, von Groote TC, Jayarajah U,  
612 Weerasekara I, Esfahani MA, Civile VT, Marusic A, Jeroncic A, Carvas Junior N,  
613 Pericic TP, Zakarija-Grkovic I, Meirelles Guimarães SM, Luigi Bragazzi N, Bjorklund  
614 M, Sofi-Mahmudi A, Altujjar M, Tian M, Arcani DMC, O'Mathúna DP, Marcolino MS.  
615 Novel Coronavirus Infection (COVID-19) in Humans: A Scoping Review and Meta-  
616 Analysis. *J Clin Med.* 2020 Mar 30;9(4). pii: E941.
- 617 Cao YG, Chen YC, Hao K, Zhang M, Liu XQ. An in vivo approach for globally  
618 estimating the drug flow between blood and tissue for nafamostat mesilate: the main  
619 hydrolysis site determination in human. *Biol Pharm Bull.* 2008 Nov;31(11):1985-9.
- 620 Capra JA, Singh M. Predicting functionally important residues from sequence  
621 conservation. *Bioinformatics.* 2007 Aug 1;23(15):1875-82.
- 622 CDC COVID-19 Response Team. Severe Outcomes Among Patients with  
623 Coronavirus Disease 2019 (COVID-19) - United States, February 12-March 16, 2020.  
624 *MMWR Morb Mortal Wkly Rep.* 2020 Mar 27;69(12):343-346.
- 625 Chakraborti S, Prabakaran P, Xiao X, Dimitrov DS. The SARS coronavirus S  
626 glycoprotein receptor binding domain: fine mapping and functional characterization.  
627 *Virol J.* 2005 Aug 25;2:73.
- 628 Channappanavar R, Perlman S. Pathogenic human coronavirus infections: causes  
629 and consequences of cytokine storm and immunopathology. *Semin Immunopathol.*  
630 2017 Jul;39(5):529-539.
- 631 Chen N, Zhou M, Dong X, Qu J, Gong F, Han Y, Qiu Y, Wang J, Liu Y, Wei Y, Xia J,  
632 Yu T, Zhang X, Zhang L. Epidemiological and clinical characteristics of 99 cases of  
633 2019 novel coronavirus pneumonia in Wuhan, China: a descriptive study. *Lancet.*  
634 2020 Feb 15;395(10223):507-513.
- 635 Chen Y, Liu Q, Guo D. Emerging coronaviruses: Genome structure, replication, and  
636 pathogenesis. *J Med Virol.* 2020b Apr;92(4):418-423.
- 637 Cinatl J, Cinatl J, Weber B, Rabenau H, Gumbel HO, Chenot JF, Scholz M, Encke A,  
638 Doerr HW. In vitro inhibition of human cytomegalovirus replication in human foreskin  
639 fibroblasts and endothelial cells by ascorbic acid 2-phosphate. *Antiviral Res.* 1995  
640 Aug;27(4):405-18.
- 641 Cinatl J, Morgenstern B, Bauer G, Chandra P, Rabenau H, Doerr HW. Glycyrrhizin,  
642 an active component of liquorice roots, and replication of SARS-associated  
643 coronavirus. *Lancet.* 2003 Jun 14;361(9374):2045-6.
- 644 Cinatl J Jr, Hoever G, Morgenstern B, Preiser W, Vogel JU, Hofmann WK, Bauer G,  
645 Michaelis M, Rabenau HF, Doerr HW. Infection of cultured intestinal epithelial cells  
646 with severe acute respiratory syndrome coronavirus. *Cell Mol Life Sci.* 2004  
647 Aug;61(16):2100-12.

648 Cinatl J Jr, Michaelis M, Morgenstern B, Doerr HW. High-dose hydrocortisone reduces  
649 expression of the pro-inflammatory chemokines CXCL8 and CXCL10 in SARS  
650 coronavirus-infected intestinal cells. *Int J Mol Med*. 2005 Feb;15(2):323-7.  
651 Corman VM, Muth D, Niemeyer D, Drosten C. Hosts and Sources of Endemic Human  
652 Coronaviruses. *Adv Virus Res*. 2018;100:163-188.  
653 Coronaviridae Study Group of the International Committee on Taxonomy of Viruses.  
654 The species Severe acute respiratory syndrome-related coronavirus: classifying 2019-  
655 nCoV and naming it SARS-CoV-2. *Nat Microbiol*. 2020 Apr;5(4):536-544.  
656 Cui J, Li F, Shi ZL. Origin and evolution of pathogenic coronaviruses. *Nat Rev*  
657 *Microbiol*. 2019 Mar;17(3):181-192.  
658 de Wit E, van Doremalen N, Falzarano D, Munster VJ. SARS and MERS: recent  
659 insights into emerging coronaviruses. *Nat Rev Microbiol*. 2016 Aug;14(8):523-34.  
660 de Wit E, Feldmann F, Cronin J, Jordan R, Okumura A, Thomas T, Scott D, Cihlar T,  
661 Feldmann H. Prophylactic and therapeutic remdesivir (GS-5734) treatment in the  
662 rhesus macaque model of MERS-CoV infection. *Proc Natl Acad Sci U S A*. 2020 Mar  
663 24;117(12):6771-6776.  
664 Dong E, Du H, Gardner L. An interactive web-based dashboard to track COVID-19 in  
665 real time. *Lancet Infect Dis*. 2020 Feb 19. pii: S1473-3099(20)30120-1. doi:  
666 10.1016/S1473-3099(20)30120-1.  
667 Dowall SD, Bewley K, Watson RJ, Vasan SS, Ghosh C, Konai MM, Gausdal G, Lorens  
668 JB, Long J, Barclay W, Garcia-Dorival I, Hiscox J, Bosworth A, Taylor I, Easterbrook  
669 L, Pitman J, Summers S, Chan-Pensley J, Funnell S, Vipond J, Charlton S, Haldar J,  
670 Hewson R, Carroll MW. Antiviral Screening of Multiple Compounds against Ebola  
671 Virus. *Viruses*. 2016 Oct 27;8(11). pii: E277.  
672 Hayashi T, Hotta H, Itoh M, Homma M. Protection of mice by a protease inhibitor,  
673 aprotinin, against lethal Sendai virus pneumonia. *J Gen Virol*. 1991 Apr;72 ( Pt 4):979-  
674 82.  
675 Hiraku S, Muryobayashi K, Ito H, Inagawa T, Tuboshima M. Absorption and excretion  
676 of camostat (FOY-305) orally administered to male rabbit and healthy subjects  
677 (English Abstract). *Iyaku Kenkyu* 1982;13:756-765.  
678 Hirota M, Shimosegawa T, Kitamura K, Takeda K, Takeyama Y, Mayumi T, Ito T,  
679 Takenaka M, Iwasaki E, Sawano H, Ishida E, Miura S, Masamune A, Nakai Y, Mitoro  
680 A, Maguchi H, Kimura K, Sanuki T, Ito T, Haradome H, Kozaka K, Gabata T, Kataoka  
681 K, Hirota M, Isaji S, Nakamura R, Yamagiwa K, Kayaba C, Ikeda K. Continuous  
682 regional arterial infusion versus intravenous administration of the protease inhibitor  
683 nafamostat mesilate for predicted severe acute pancreatitis: a multicenter,  
684 randomized, open-label, phase 2 trial. *J Gastroenterol*. 2020 Mar;55(3):342-352.  
685 Hoehl S, Berger A, Kortenbusch M, Cinatl J, Bojkova D, Rabenau H, Behrens P,  
686 Böddinghaus B, Götsch U, Naujoks F, Neumann P, Schork J, Tiarks-Jungk P, Walczok  
687 A, Eickmann M, Vehreschild MJGT, Kann G, Wolf T, Gottschalk R, Ciesek S. Evidence  
688 of SARS-CoV-2 Infection in Returning Travelers from Wuhan, China. *N Engl J Med*.  
689 2020 Mar 26;382(13):1278-1280.  
690 Hoenen T, Groseth A, Feldmann H. Therapeutic strategies to target the Ebola virus  
691 life cycle. *Nat Rev Microbiol*. 2019 Oct;17(10):593-606.  
692 Hoffmann M, Kleine-Weber H, Schroeder S, Krüger N, Herrler T, Erichsen S,  
693 Schiergens TS, Herrler G, Wu NH, Nitsche A, Müller MA, Drosten C, Pöhlmann S.  
694 SARS-CoV-2 Cell Entry Depends on ACE2 and TMPRSS2 and Is Blocked by a  
695 Clinically Proven Protease Inhibitor. *Cell*. 2020 Mar 4. pii: S0092-8674(20)30229-4.

696 Ikemura K, Hiramatsu S, Okuda M. Drug Repositioning of Proton Pump Inhibitors for  
697 Enhanced Efficacy and Safety of Cancer Chemotherapy. *Front Pharmacol*. 2017 Dec  
698 12;8:911.

699 Iwata-Yoshikawa N, Okamura T, Shimizu Y, Hasegawa H, Takeda M, Nagata N.  
700 TMPRSS2 Contributes to Virus Spread and Immunopathology in the Airways of  
701 Murine Models after Coronavirus Infection. *J Virol*. 2019 Mar 5;93(6). pii: e01815-18.

702 Kamitani W, Narayanan K, Huang C, Lokugamage K, Ikegami T, Ito N, Kubo H,  
703 Makino S. Severe acute respiratory syndrome coronavirus nsp1 protein suppresses  
704 host gene expression by promoting host mRNA degradation. *Proc Natl Acad Sci U S*  
705 *A*. 2006 Aug 22;103(34):12885-90.

706 Kapadia BH, Torre BB, Ullman N, Yang A, Harb MA, Grieco PW, Newman JM, Harwin  
707 SF, Maheshwari AV. Reducing perioperative blood loss with antifibrinolytics and  
708 antifibrinolytic-like agents for patients undergoing total hip and total knee arthroplasty.  
709 *Orthop*. 2019 Jul 2;16(6):513-516.

710 Kawase M, Shirato K, van der Hoek L, Taguchi F, Matsuyama S. Simultaneous  
711 treatment of human bronchial epithelial cells with serine and cysteine protease  
712 inhibitors prevents severe acute respiratory syndrome coronavirus entry. *J Virol*. 2012  
713 Jun;86(12):6537-45.

714 Kelley LA, Mezulis S, Yates CM, Wass MN, Sternberg MJ. The Phyre2 web portal for  
715 protein modeling, prediction and analysis. *Nat Protoc*. 2015 Jun;10(6):845-58.

716 Letko M, Marzi A, Munster V. Functional assessment of cell entry and receptor usage  
717 for SARS-CoV-2 and other lineage B betacoronaviruses. *Nat Microbiol*. 2020  
718 Apr;5(4):562-569.

719 Levy JH, Bailey JM, Salmenperä M. Pharmacokinetics of aprotinin in preoperative  
720 cardiac surgical patients. *Anesthesiology*. 1994 May;80(5):1013-8.

721 Li W, Moore MJ, Vasilieva N, Sui J, Wong SK, Berne MA, Somasundaran M, Sullivan  
722 JL, Luzuriaga K, Greenough TC, Choe H, Farzan M. Angiotensin-converting enzyme  
723 2 is a functional receptor for the SARS coronavirus. *Nature*. 2003 Nov  
724 27;426(6965):450-4.

725 Li Q, Guan X, Wu P, Wang X, Zhou L, Tong Y, Ren R, Leung KSM, Lau EHY, Wong  
726 JY, Xing X, Xiang N, Wu Y, Li C, Chen Q, Li D, Liu T, Zhao J, Li M, Tu W, Chen C, Jin  
727 L, Yang R, Wang Q, Zhou S, Wang R, Liu H, Luo Y, Liu Y, Shao G, Li H, Tao Z, Yang  
728 Y, Deng Z, Liu B, Ma Z, Zhang Y, Shi G, Lam TTY, Wu JTK, Gao GF, Cowling BJ,  
729 Yang B, Leung GM, Feng Z. Early Transmission Dynamics in Wuhan, China, of Novel  
730 Coronavirus-Infected Pneumonia. *N Engl J Med*. 2020 Mar 26;382(13):1199-1207.

731 Lin KH, Ali A, Rusere L, Soumana DI, Kurt Yilmaz N, Schiffer CA. Dengue Virus  
732 NS2B/NS3 Protease Inhibitors Exploiting the Prime Side. *J Virol*. 2017 Apr 28;91(10).  
733 pii: e00045-17.

734 Lokugamage KG, Hage A, Schindewolf C, Rajsbaum R, Menachery VD. SARS-CoV-  
735 2 is sensitive to type I interferon pretreatment. *bioRxiv*, doi:  
736 10.1101/2020.03.07.982264.

737 Lu R, Zhao X, Li J, Niu P, Yang B, Wu H, Wang W, Song H, Huang B, Zhu N, Bi Y,  
738 Ma X, Zhan F, Wang L, Hu T, Zhou H, Hu Z, Zhou W, Zhao L, Chen J, Meng Y, Wang  
739 J, Lin Y, Yuan J, Xie Z, Ma J, Liu WJ, Wang D, Xu W, Holmes EC, Gao GF, Wu G,  
740 Chen W, Shi W, Tan W. Genomic characterisation and epidemiology of 2019 novel  
741 coronavirus: implications for virus origins and receptor binding. *Lancet*. 2020 Feb  
742 22;395(10224):565-574.

743 Luan J, Lu Y, Jin X, Zhang L. Spike protein recognition of mammalian ACE2 predicts  
744 the host range and an optimized ACE2 for SARS-CoV-2 infection. *Biochem Biophys*



- 745 Res Commun. 2020 Mar 19. pii: S0006-291X(20)30526-X. doi:  
746 10.1016/j.bbrc.2020.03.047.
- 747 Martell HJ, Masterson SG, McGreig JE, Michaelis M, Wass MN. Is the Bombali virus  
748 pathogenic in humans? *Bioinformatics*. 2019 Oct 1;35(19):3553-3558.
- 749 Matsuyama S, Nagata N, Shirato K, Kawase M, Takeda M, Taguchi F. Efficient  
750 activation of the severe acute respiratory syndrome coronavirus spike protein by the  
751 transmembrane protease TMPRSS2. *J Virol*. 2010 Dec;84(24):12658-64.
- 752 Matsuyama S, Nao N, Shirato K, Kawase M, Saito S, Takayama I, Nagata N, Sekizuka  
753 T, Katoh H, Kato F, Sakata M, Tahara M, Kutsuna S, Ohmagari N, Kuroda M, Suzuki  
754 T, Kageyama T, Takeda M. Enhanced isolation of SARS-CoV-2 by TMPRSS2-  
755 expressing cells. *Proc Natl Acad Sci U S A*. 2020 Mar 12. pii: 202002589. doi:  
756 10.1073/pnas.2002589117.
- 757 Michaelis M, Kleinschmidt MC, Bojkova D, Rabenau HF, Wass MN, Cinatl J Jr.  
758 Omeprazole Increases the Efficacy of Acyclovir Against Herpes Simplex Virus Type 1  
759 and 2. *Front Microbiol*. 2019 Dec 3;10:2790.
- 760 Minakata D, Fujiwara SI, Hayakawa J, Nakasone H, Ikeda T, Kawaguchi SI, Toda Y,  
761 Ito S, Ochi SI, Nagayama T, Mashima K, Umino K, Nakano H, Yamasaki R, Morita K,  
762 Kawasaki Y, Sugimoto M, Ishihara Y, Yamamoto C, Ashizawa M, Hatano K, Sato K,  
763 Oh I, Ohmine K, Muroi K, Ohmori T, Kanda Y. Comparison of Danaparoid Sodium and  
764 Synthetic Protease Inhibitors for the Treatment of Disseminated Intravascular  
765 Coagulation Associated with Hematological Malignancies: A Retrospective Analysis.  
766 *Acta Haematol*. 2019 Aug 28:1-10.
- 767 Moggia E, Koti R, Belgaumkar AP, Fazio F, Pereira SP, Davidson BR, Gurusamy KS.  
768 Pharmacological interventions for acute pancreatitis. *Cochrane Database Syst Rev*.  
769 2017 Apr 21;4:CD011384.
- 770 Mosmann T. Rapid colorimetric assay for cellular growth and survival: application to  
771 proliferation and cytotoxicity assays. *J Immunol Methods*. 1983 Dec 16;65(1-2):55-63.
- 772 Nishiura H, Kobayashi T, Yang Y, Hayashi K, Miyama T, Kinoshita R, Linton NM, Jung  
773 SM, Yuan B, Suzuki A, Akhmetzhanov AR. The Rate of Underascertainment of Novel  
774 Coronavirus (2019-nCoV) Infection: Estimation Using Japanese Passengers Data on  
775 Evacuation Flights. *J Clin Med*. 2020 Feb 4;9(2). pii: E419. doi: 10.3390/jcm9020419.
- 776 Nishiura H, Linton NM, Akhmetzhanov AR. Initial Cluster of Novel Coronavirus (2019-  
777 nCoV) Infections in Wuhan, China Is Consistent with Substantial Human-to-Human  
778 Transmission. *J Clin Med*. 2020a Feb 11;9(2). pii: E488. doi: 10.3390/jcm9020488.
- 779 Onafuye H, Pieper S, Mulac D, Cinatl J Jr, Wass MN, Langer K, Michaelis M.  
780 Doxorubicin-loaded human serum albumin nanoparticles overcome transporter-  
781 mediated drug resistance in drug-adapted cancer cells. *Beilstein J Nanotechnol*. 2019  
782 Aug 14;10:1707-1715.
- 783 Pan X, Chen D, Xia Y, Wu X, Li T, Ou X, Zhou L, Liu J. Asymptomatic cases in a family  
784 cluster with SARS-CoV-2 infection. *Lancet Infect Dis*. 2020 Apr;20(4):410-411.
- 785 Pappalardo M, Juliá M, Howard MJ, Rossman JS, Michaelis M, Wass MN. Conserved  
786 differences in protein sequence determine the human pathogenicity of Ebolaviruses.  
787 *Sci Rep*. 2016 Mar 24;6:23743.
- 788 Pickett BE, Sadat EL, Zhang Y, Noronha JM, Squires RB, Hunt V, Liu M, Kumar S,  
789 Zaremba S, Gu Z, Zhou L, Larson C, Dietrich J, Klem EB, Scheuermann RH. ViPR:  
790 an open bioinformatics database and analysis resource for virology research. *Nucleic  
791 Acids Res*. 2012 Jan;40(Database issue):D593-8.
- 792 Pickett BE, Greer DS, Zhang Y, Stewart L, Zhou L, Sun G, Gu Z, Kumar S, Zaremba  
793 S, Larsen CN, Jen W, Klem EB, Scheuermann RH. Virus pathogen database and  
794 analysis resource (ViPR): a comprehensive bioinformatics database and analysis

795 resource for the coronavirus research community. *Viruses*. 2012A Nov 19;4(11):3209-  
796 26.

797 Qiu Y, Zhao YB, Wang Q, Li JY, Zhou ZJ, Liao CH, Ge XY. Predicting the angiotensin  
798 converting enzyme 2 (ACE2) utilizing capability as the receptor of SARS-CoV-2.  
799 *Microbes Infect*. 2020 Mar 18. pii: S1286-4579(20)30049-6. doi:  
800 10.1016/j.micinf.2020.03.003.

801 Ramsey ML, Nuttall J, Hart PA; TACTIC Investigative Team. A phase 1/2 trial to  
802 evaluate the pharmacokinetics, safety, and efficacy of NI-03 in patients with chronic  
803 pancreatitis: study protocol for a randomized controlled trial on the assessment of  
804 camostat treatment in chronic pancreatitis (TACTIC). *Trials*. 2019 Aug 14;20(1):501.

805 Randolph VB, Stollar V. Low pH-induced cell fusion in flavivirus-infected *Aedes*  
806 *albopictus* cell cultures. *J Gen Virol*. 1990 Aug;71 ( Pt 8):1845-50.

807 Rausell A, Juan D, Pazos F, Valencia A. Protein interactions and ligand binding: from  
808 protein subfamilies to functional specificity. *Proc Natl Acad Sci U S A*. 2010 Feb  
809 2;107(5):1995-2000.

810 Reinke LM, Spiegel M, Plegge T, Hartleib A, Nehlmeier I, Gierer S, Hoffmann M,  
811 Hofmann-Winkler H, Winkler M, Pöhlmann S. Different residues in the SARS-CoV  
812 spike protein determine cleavage and activation by the host cell protease TMPRSS2.  
813 *PLoS One*. 2017 Jun 21;12(6):e0179177.

814 Rice P, Longden I, Bleasby A. EMBOSS: the European Molecular Biology Open  
815 Software Suite. *Trends Genet*. 2000 Jun;16(6):276-7.

816 Rothe C, Schunk M, Sothmann P, Bretzel G, Froeschl G, Wallrauch C, Zimmer T,  
817 Thiel V, Janke C, Guggemos W, Seilmaier M, Drosten C, Vollmar P, Zwirgmaier K,  
818 Zange S, Wölfel R, Hoelscher M. Transmission of 2019-nCoV Infection from an  
819 Asymptomatic Contact in Germany. *N Engl J Med*. 2020 Mar 5;382(10):970-971.

820 Sheahan TP, Sims AC, Leist SR, Schäfer A, Won J, Brown AJ, Montgomery SA, Hogg  
821 A, Babusis D, Clarke MO, Spahn JE, Bauer L, Sellers S, Porter D, Feng JY, Cihlar T,  
822 Jordan R, Denison MR, Baric RS. Comparative therapeutic efficacy of remdesivir and  
823 combination lopinavir, ritonavir, and interferon beta against MERS-CoV. *Nat Commun*.  
824 2020 Jan 10;11(1):222.

825 Shen LW, Mao HJ, Wu YL, Tanaka Y, Zhang W. TMPRSS2: A potential target for  
826 treatment of influenza virus and coronavirus infections. *Biochimie*. 2017 Nov;142:1-  
827 10.

828 Shin JM, Kim N. Pharmacokinetics and pharmacodynamics of the proton pump  
829 inhibitors. *J Neurogastroenterol Motil*. 2013 Jan;19(1):25-35.

830 Shin WJ, Seong BL. Type II transmembrane serine proteases as potential target for  
831 anti-influenza drug discovery. *Expert Opin Drug Discov*. 2017 Nov;12(11):1139-1152.

832 Sievers F, Wilm A, Dineen D, Gibson TJ, Karplus K, Li W, Lopez R, McWilliam H,  
833 Remmert M, Söding J, Thompson JD, Higgins DG. Fast, scalable generation of high-  
834 quality protein multiple sequence alignments using Clustal Omega. *Mol Syst Biol*.  
835 2011 Oct 11;7:539.

836 Simmons G, Zmora P, Gierer S, Heurich A, Pöhlmann S. Proteolytic activation of the  
837 SARS-coronavirus spike protein: cutting enzymes at the cutting edge of antiviral  
838 research. *Antiviral Res*. 2013 Dec;100(3):605-14.

839 Song W, Gui M, Wang X, Xiang Y. Cryo-EM structure of the SARS coronavirus spike  
840 glycoprotein in complex with its host cell receptor ACE2. *PLoS Pathog*. 2018 Aug  
841 13;14(8):e1007236.

842 Song Z, Xu Y, Bao L, Zhang L, Yu P, Qu Y, Zhu H, Zhao W, Han Y, Qin C. From SARS  
843 to MERS, Thrusting Coronaviruses into the Spotlight. *Viruses*. 2019 Jan 14;11(1). pii:  
844 E59.

- 845 Strickland M, Ehrlich LS, Watanabe S, Khan M, Strub MP, Luan CH, Powell MD, Leis  
846 J, Tjandra N, Carter CA. Tsg101 chaperone function revealed by HIV-1 assembly  
847 inhibitors. *Nat Commun.* 2017 Nov 9;8(1):1391.
- 848 Talbot PJ, Vance DE. Evidence that Sindbis virus infects BHK-21 cells via a lysosomal  
849 route. *Can J Biochem.* 1980 Oct;58(10):1131-7.
- 850 Totura AL, Baric RS. SARS coronavirus pathogenesis: host innate immune responses  
851 and viral antagonism of interferon. *Curr Opin Virol.* 2012 Jun;2(3):264-75.
- 852 Touret F, de Lamballerie X. Of chloroquine and COVID-19. *Antiviral Res.* 2020 Mar  
853 5;177:104762.
- 854 Walls AC, Park YJ, Tortorici MA, Wall A, McGuire AT, Velesler D. Structure, Function,  
855 and Antigenicity of the SARS-CoV-2 Spike Glycoprotein. *Cell.* 2020 Mar 6. pii: S0092-  
856 8674(20)30262-2. doi: 10.1016/j.cell.2020.02.058.
- 857 Wan Y, Shang J, Graham R, Baric RS, Li F. Receptor recognition by novel coronavirus  
858 from Wuhan: An analysis based on decade-long structural studies of SARS. *J Virol.*  
859 2020 Mar 17;94(7). pii: e00127-20.
- 860 Wang M, Cao R, Zhang L, Yang X, Liu J, Xu M, Shi Z, Hu Z, Zhong W, Xiao G.  
861 Remdesivir and chloroquine effectively inhibit the recently emerged novel coronavirus  
862 (2019-nCoV) in vitro. *Cell Res.* 2020 Mar;30(3):269-271.
- 863 Watanabe SM, Ehrlich LS, Strickland M, Li X, Soloveva V, Goff AJ, Stauff CB, Bhaduri-  
864 McIntosh S, Tjandra N, Carter C. Selective Targeting of Virus Replication by Proton  
865 Pump Inhibitors. *Sci Rep.* 2020 Mar 4;10(1):4003.
- 866 Wrapp D, Wang N, Corbett KS, Goldsmith JA, Hsieh CL, Abiona O, Graham BS,  
867 McLellan JS. Cryo-EM structure of the 2019-nCoV spike in the prefusion conformation.  
868 *Science.* 2020 Mar 13;367(6483):1260-1263.
- 869 Wu F, Zhao S, Yu B, Chen YM, Wang W, Song ZG, Hu Y, Tao ZW, Tian JH, Pei YY,  
870 Yuan ML, Zhang YL, Dai FH, Liu Y, Wang QM, Zheng JJ, Xu L, Holmes EC, Zhang  
871 YZ. A new coronavirus associated with human respiratory disease in China. *Nature.*  
872 2020 Mar;579(7798):265-269.
- 873 Wu A, Peng Y, Huang B, Ding X, Wang X, Niu P, Meng J, Zhu Z, Zhang Z, Wang J,  
874 Sheng J, Quan L, Xia Z, Tan W, Cheng G, Jiang T. Genome Composition and  
875 Divergence of the Novel Coronavirus (2019-nCoV) Originating in China. *Cell Host*  
876 *Microbe.* 2020b Mar 11;27(3):325-328.
- 877 Xu H, Zhong L, Deng J, Peng J, Dan H, Zeng X, Li T, Chen Q. High expression of  
878 ACE2 receptor of 2019-nCoV on the epithelial cells of oral mucosa. *Int J Oral Sci.*  
879 2020 Feb 24;12(1):8.
- 880 Yamamoto M, Matsuyama S, Li X, Takeda M, Kawaguchi Y, Inoue JI, Matsuda Z.  
881 Identification of Nafamostat as a Potent Inhibitor of Middle East Respiratory Syndrome  
882 Coronavirus S Protein-Mediated Membrane Fusion Using the Split-Protein-Based  
883 Cell-Cell Fusion Assay. *Antimicrob Agents Chemother.* 2016 Oct 21;60(11):6532-  
884 6539.
- 885 Yan R, Zhang Y, Li Y, Xia L, Guo Y, Zhou Q. Structural basis for the recognition of  
886 SARS-CoV-2 by full-length human ACE2. *Science.* 2020 Mar 27;367(6485):1444-  
887 1448.
- 888 Yang Y, Shang W, Rao X. Facing the COVID-19 outbreak: What should we know and  
889 what could we do? *J Med Virol.* 2020 Feb 24. doi: 10.1002/jmv.25720.
- 890 Yin Y, Wunderink RG. MERS, SARS and other coronaviruses as causes of  
891 pneumonia. *Respirology.* 2018 Feb;23(2):130-137.
- 892 Yu P, Zhu J, Zhang Z, Han Y, Huang L. A familial cluster of infection associated with  
893 the 2019 novel coronavirus indicating potential person-to-person transmission during

894 the incubation period. *J Infect Dis.* 2020 Feb 18. pii: jiaa077. doi:  
895 10.1093/infdis/jiaa077.  
896 Zhirnov OP, Klenk HD, Wright PF. Aprotinin and similar protease inhibitors as drugs  
897 against influenza. *Antiviral Res.* 2011 Oct;92(1):27-36.  
898 Zhou Y, Vedantham P, Lu K, Agudelo J, Carrion R Jr, Nunneley JW, Barnard D,  
899 Pöhlmann S, McKerrow JH, Renslo AR, Simmons G. Protease inhibitors targeting  
900 coronavirus and filovirus entry. *Antiviral Res.* 2015 Apr;116:76-84.  
901 Zhou P, Yang XL, Wang XG, Hu B, Zhang L, Zhang W, Si HR, Zhu Y, Li B, Huang CL,  
902 Chen HD, Chen J, Luo Y, Guo H, Jiang RD, Liu MQ, Chen Y, Shen XR, Wang X,  
903 Zheng XS, Zhao K, Chen QJ, Deng F, Liu LL, Yan B, Zhan FX, Wang YY, Xiao GF,  
904 Shi ZL. A pneumonia outbreak associated with a new coronavirus of probable bat  
905 origin. *Nature.* 2020 Mar;579(7798):270-273.  
906 Zhu N, Zhang D, Wang W, Li X, Yang B, Song J, Zhao X, Huang B, Shi W, Lu R, Niu  
907 P, Zhan F, Ma X, Wang D, Xu W, Wu G, Gao GF, Tan W; China Novel Coronavirus  
908 Investigating and Research Team. *N Engl J Med.* 2020 Feb 20;382(8):727-733.
